# Supplementary material for: Long-Term Monitoring of Bioaerosols in an Environment without UV and Desiccation Stress, an Example from the Cave Postojnska Jama, Slovenia
Source: MDPI journal article supplement (doi:10.3390/microorganisms11030809), 2023-03-22
Supplement: s1 [file s1]

**Table S1.** Average values of climatic parameters from June 2020 to June 2021, and concentration of settled airborne biomass with CV (expressed in RLU of ATP) from April to November 2020.

| Site | Main impact  | Air velocity<br>(m/s) | Air flow<br>(l/s)  | Air<br>temperature<br>(°C) | ATP ± SD<br>(RLU)      | CV<br>(%)    |
|------|--------------|-----------------------|--------------------|----------------------------|------------------------|--------------|
| 1    | River, train | 0.05 ± 0.06           | 3.77 ± 4.35        | <b>11.0 ± 3.9</b>          | 3672.7 ± 1324.7        | 36.1         |
| 2    | Train        | 0.08 ± 0.12           | 6.20 ± 8.69        | 9.0 ± 1.3                  | 1376.5 ± 846.9         | 61.5         |
| 3    | Train        | 0.02 ± 0.04           | 1.65 ± 2.77        | 9.2 ± 0.5                  | 542.7 ± 218.4          | 40.3         |
| 4    | Train        | 0.01 ± 0.03           | 0.87 ± 1.82        | 9.4 ± 0.3                  | 182.3 ± 30.9           | 16.9         |
| 5    | Train        | 0.07 ± 0.08           | 4.84 ± 5.52        | 9.5 ± 0.3                  | 1406.3 ± 268.6         | 19.1         |
| 6    | Visitors     | 0.01 ± 0.01           | 0.56 ± 0.53        | 10.3 ± 0.2                 | 253.5 ± 167.8          | 66.2         |
| 7    | Visitors     | 0.01 ± 0.01           | 0.79 ± 0.62        | 10.3 ± 0.2                 | 623.0 ± 220.0          | 35.3         |
| 8    | Visitors     | 0.01 ± 0.02           | 1.05 ± 1.67        | 10.3 ± 0.2                 | 463.7 ± 37.0           | 8.0          |
| 9    | Visitors     | 0.01 ± 0.02           | 1.00 ± 1.18        | 10.2 ± 0.2                 | 1520.3 ± 1573.2        | 103.5        |
| 10   | Visitors     | 0.01 ± 0.01           | 0.46 ± 0.65        | 10.1 ± 0.2                 | 2286.7 ± 3239.8        | 141.7        |
| 11   | Visitors     | 0.01 ± 0.02           | 0.72 ± 1.18        | 10.1 ± 0.2                 | <b>4780.7 ± 2981.1</b> | 62.4         |
| 12   | Visitors*    | 0.02 ± 0.04           | 1.75 ± 3.04        | 9.6 ± 0.1                  | 347.3 ± 125.8          | 36.2         |
| 13   | Visitors     | 0.02 ± 0.03           | 1.44 ± 1.85        | 9.7 ± 0.1                  | 1695.3 ± 1840.1        | 108.5        |
| 14   | Visitors     | 0.00 ± 0.01           | 0.32 ± 0.23        | 9.8 ± 0.1                  | 1074.5 ± 2352.5        | <b>218.9</b> |
| 15   | Visitors     | 0.02 ± 0.02           | 1.31 ± 1.43        | 10.3 ± 0.2                 | 655.3 ± 158.5          | 24.2         |
| 16   | Train        | <b>0.11 ± 0.11</b>    | <b>7.82 ± 8.20</b> | 10.4 ± 0.3                 | 687.8 ± 450.6          | 65.5         |
| 17   | Visitors     | 0.01 ± 0.01           | 0.54 ± 0.64        | 11.0 ± 0.5                 | 2593.7 ± 725.3         | 28.0         |
| 1–17 |              | 0.04 ± 0.08           | 2.65 ± 5.72        | 10.1 ± 1.6                 | 1479.4 ± 1703.2        | 115.1        |

**in bold** – site with the highest value of the parameter; \* – site located 20 m above the tourist footpath

**Table S2.** Biomass dynamics during bioaerosol settling experiments between January 2018–January 2019 (aerosols analysed after 3, 6, and 12 months) and January 2019–November 2020 (aerosols analysed after 7, 13, and 22 months)

| Site                    | Experiment<br>(Years: Months) | Fungi | Bacteria | <i>Staphylococcus</i> | ATP  | LPS  | BG   |
|-------------------------|-------------------------------|-------|----------|-----------------------|------|------|------|
| 1                       | 2018–2019: 3–6–12             | –     | –        | 0                     | +    | ±    | +    |
|                         | 2019–2020: 7–13–22            | ±     | +        | –                     | +    | ±    | –    |
| 2                       | 2018–2019: 3–6–12             | +     | ±        | 0                     | ±    | –    | +    |
|                         | 2019–2020: 7–13–22            | ±     | +        | ±                     | ±    | ±    | ±    |
| 3                       | 2018–2019: 3–6–12             | ±     | ±        | ±                     | ±    | ±    | ±    |
|                         | 2019–2020: 7–13–22            | ±     | ±        | ±                     | ±    | ±    | ±    |
| 4                       | 2018–2019: 3–6–12             | +     | +        | ±                     | +    | +    | ±    |
|                         | 2019–2020: 7–13–22            | +     | +        | +                     | –    | ±    | ±    |
| 5                       | 2018–2019: 3–6–12             | +     | –        | ±                     | ±    | ±    | +    |
|                         | 2019–2020: 7–13–22            | ±     | ±        | –                     | ±    | +    | ±    |
| 6                       | 2018–2019: 3–6–12             | +     | ±        | 0                     | ±    | ±    | +    |
|                         | 2019–2020: 7–13–22            | ±     | ±        | –                     | +    | ±    | ±    |
| 7                       | 2018–2019: 3–6–12             | +     | ±        | ±                     | +    | ±    | +    |
|                         | 2019–2020: 7–13–22            | ±     | ±        | ±                     | ±    | +    | +    |
| 8                       | 2018–2019: 3–6–12             | ±     | ±        | 0                     | ±    | ±    | +    |
|                         | 2019–2020: 7–13–22            | ±     | ±        | ±                     | –    | ±    | +    |
| 9                       | 2018–2019: 3–6–12             | ±     | ±        | 0                     | ±    | ±    | ±    |
|                         | 2019–2020: 7–13–22            | ±     | –        | ±                     | –    | +    | +    |
| 10                      | 2018–2019: 3–6–12             | ±     | +        | ±                     | +    | ±    | +    |
|                         | 2019–2020: 7–13–22            | ±     | ±        | –                     | ±    | ±    | +    |
| 11                      | 2018–2019: 3–6–12             | +     | +        | ±                     | +    | +    | +    |
|                         | 2019–2020: 7–13–22            | +     | +        | +                     | +    | ±    | ±    |
| 12                      | 2018–2019: 3–6–12             | ±     | ±        | 0                     | +    | ±    | ±    |
|                         | 2019–2020: 7–13–22            | ±     | ±        | ±                     | –    | ±    | ±    |
| 13                      | 2018–2019: 3–6–12             | +     | +        | ±                     | +    | +    | +    |
|                         | 2019–2020: 7–13–22            | ±     | +        | –                     | +    | +    | +    |
| 14                      | 2018–2019: 3–6–12             | +     | +        | ±                     | ±    | ±    | +    |
|                         | 2019–2020: 7–13–22            | ±     | ±        | –                     | ±    | –    | ±    |
| 15                      | 2018–2019: 3–6–12             | +     | +        | 0                     | +    | +    | +    |
|                         | 2019–2020: 7–13–22            | ±     | ±        | ±                     | ±    | +    | ±    |
| 16                      | 2018–2019: 3–6–12             | ±     | ±        | 0                     | +    | +    | +    |
|                         | 2019–2020: 7–13–22            | ±     | ±        | –                     | –    | ±    | ±    |
| 17                      | 2018–2019: 3–6–12             | ±     | ±        | ±                     | +    | ±    | +    |
|                         | 2019–2020: 7–13–22            | ±     | +        | ±                     | ±    | ±    | ±    |
| <b>Accumulation (%)</b> |                               | 32.4  | 35.3     | 5.9                   | 41.2 | 29.4 | 52.9 |
| <b>Reduction (%)</b>    |                               | 2.9   | 8.8      | 20.6                  | 14.7 | 5.9  | 2.9  |
| <b>Equivocal (%)</b>    |                               | 64.7  | 55.9     | 50.0                  | 44.1 | 64.7 | 44.1 |
| <b>“0” (%)</b>          |                               | 0.0   | 0.0      | 23.5                  |      |      |      |

“+” – accumulation; “–” – reduction; “±” – equivocal; “0” – 0 CFU/20 cm<sup>2</sup>

**Table S3.** Ranges of measured biomass parameters (2018–2019 and 2019–2020)

| Site | ATP<br>(RLU)     | Fungi<br>(CFU/20 cm <sup>2</sup> ) | Bacteria<br>(CFU/20 cm <sup>2</sup> ) | <i>Staphylococcus</i><br>(CFU/20 cm <sup>2</sup> ) | LPS<br>(EU/20 cm <sup>2</sup> ) | BG<br>(ng/20 cm <sup>2</sup> ) |
|------|------------------|------------------------------------|---------------------------------------|----------------------------------------------------|---------------------------------|--------------------------------|
| 1    | 539–2,691        | 2,515–55,645                       | 27,037–514,640                        | 0–50                                               | 1,258–113,901                   | 17–555                         |
| 2    | 508–2,064        | 635–10,689                         | 24,522–285,454                        | 0–16                                               | 1,182–17,527                    | 3–66                           |
| 3    | 45–748           | 13,518–52,816                      | 9,117–268,481                         | 0–19                                               | 138–1,547                       | 8–187                          |
| 4    | 1–374            | 289–32,067                         | 113–59,984                            | 0–6                                                | 2–503                           | 1–52                           |
| 5    | 220–3,456        | 1,050–43,384                       | 33,953–319,410                        | 0–22                                               | 843–145,068                     | 13–114                         |
| 6    | 14–1,286         | 270–18,234                         | 104–1,186,261                         | 0–11                                               | 20–157,190                      | 2–85                           |
| 7    | 59–2,842         | 0–33,953                           | 65,416–414,982                        | 0–14                                               | 250–61,241                      | 11–144                         |
| 8    | 391–4,613        | 553–92,294                         | 145,872–1,580,422                     | 0–3                                                | <b>2,339–608,376</b>            | 1–86                           |
| 9    | 422–4,635        | 817–21,315                         | 66,020–362,795                        | 0–20                                               | 3,408–356,671                   | 5–175                          |
| 10   | <b>944–7,318</b> | 8,252–290,487                      | <b>138,972–13,518,346</b>             | <b>0–1462</b>                                      | 5,890–393,780                   | 2–2,796                        |
| 11   | 22–2,471         | 176–36,782                         | 1,091–1,765,433                       | 0–10                                               | 33–4,112                        | 5–76                           |
| 12   | 285–2,700        | 0–62,876                           | 15,071–180,976                        | 0–3                                                | 966–541,991                     | 11–92                          |
| 13   | 20–4,391         | <b>651–420,012</b>                 | 73,565–1,273,240                      | 0–264                                              | 478–48,377                      | <b>13–4,729</b>                |
| 14   | 3–4,255          | 44–37,726                          | 119–773,375                           | 0–310                                              | 39–49,320                       | 1–360                          |
| 15   | 1–405            | 57–27,980                          | 233–61,619                            | 0–14                                               | 2–1,346                         | 3–120                          |
| 16   | 87–3,768         | 0–6,033                            | 11,091–192,420                        | 0–183                                              | 4,616–32,184                    | 3–524                          |
| 17   | 50–5,290         | 3207–115,482                       | 54,193–1,383,273                      | 0–102                                              | 6,275–60,991                    | 2–589                          |

**In bold** – site with the highest value of the parameter.
